# Supplementary material for: Eukaryotic life without tQCUG: the role of Elongator-dependent tRNA modifications in Dictyostelium discoideum
Source: PubMed Central journal article supplement — Nucleic Acids Res. 2020 Jul 1;48(14):7899–913. doi: 10.1093/nar/gkaa560 (PMC7430636; doi:10.1093/nar/gkaa560), 2020-07-01
Supplement: gkaa560_supplemental_file.pdf [file gkaa560_supplemental_file.pdf]

## Supplementary Information to

Schäck et al.: **Eukaryotic life without tQ<sup>CUG</sup>**: the role of Elongator-dependent tRNA modifications in *Dictyostelium discoideum*

This file contains

- **Table S1.** Oligonucleotides used in this study.
- **Table S2:** Elongator proteins in *D. discoideum*.
- **Table S3:** Mass spectrometric parameters for detection of nucleosides.
- **Table S4:** Minimal detectable amount of modified nucleoside per tRNA [in %] in a 100 ng tRNA injection.
- **Figure S1.** Deletion of the *D. discoideum elp3* gene.
- **Figure S2.** Deletion of the *D. discoideum trm9* gene.
- **Figure S3.** Deletion of the *D. discoideum ctu1* gene in the Ax2 and *elp3*<sup>−</sup> strains.
- **Figure S4.** SEC chromatogram of total RNA before SEC purification and tRNA fraction after SEC purification.
- **Figure S5.** LC-MS/MS chromatogram of synthetic standards for analysis of modified nucleosides.
- **Figure S6.** Calibration curves for quantification of nucleosides by photometric and mass spectrometric detection.
- **Figure S7.** Sketch of poly glutamine leader constructs fused to GFP.

**Table S1.** Oligonucleotides used in this study.

| Gene                    | Application <sup>a</sup> | Name <sup>b</sup> | Primer | Sequence                                                |
|-------------------------|--------------------------|-------------------|--------|---------------------------------------------------------|
| <i>elp3</i>             | Gene deletion            | left arm fw       | #2043  | AGCGCGTCTCCAATGACTAGTGACGGCGCTAAACCAGTTTGTAAAG          |
|                         |                          | left arm rev      | #2044  | AGCGCGTCTCCGTTGTTGCTAAATGTGGGCAACGATGTGG                |
|                         |                          | right arm fw      | #2045  | AGCGCGTCTCCCTTCGGTTTACTTCGTCTTAGAAAATGTTTCTAG           |
|                         |                          | right arm rev     | #2046  | AGCGCGTCTCTCCCACTAGTAAGGAAACCTCAAATCATATCTTACTTGG       |
|                         | Wt detection             | outer fw          | #2047  | TGAATGACCCAAGACCTGTTTC                                  |
|                         |                          | inner fw          | #2048  | GCACGTGATACAAAATCGTGGTCAT                               |
|                         |                          | outer fw          | #2049  | ACCTGGACAATATACACAAATATTACC                             |
|                         |                          | outer rev         | #2050  | GCCTTCAACAAGCCATGCTCC                                   |
|                         | Over expression          | N-term fw         | #2059  | AGAAGATCTATGTCATTAATGAATGACCCAAGACC                     |
|                         |                          | N-term rev        | #2106  | AGAACTAGTTTAACCAAGATATTTTGAAACGTAAACACC                 |
|                         |                          | C-term fw         | #2061  | AGAAGATCTTCATTAATGAATGACCCAAGACCTGTT                    |
|                         |                          | C-term rev        | #2062  | AGAACTAGTTTAACCAAGATATTTTGAAACGTAAACACC                 |
|                         | HAT mutant               |                   | p1     | AGCGGCTCTTCAATGATGTCATTAATGAATGACCCAAG                  |
|                         |                          |                   | p2     | AGCGGCTCTTCGATAAAATTGATGTTGAAATTTAGTTGGATC              |
|                         |                          |                   | p3     | AGCGGCTCTTCGTATTTTACTTTATTAATGGAAGAAGCTG                |
|                         |                          |                   | p4     | AGCGGCTCTTCCCACCAAGATATTTTGAAACGTAAAC                   |
|                         | SAM mutant               | outer fw          | #2205  | AGCGGCTCTTCAATGATGTCATTAATGAATGACCCAAG                  |
|                         |                          | rev 1             | #2205  | AGCGGCTCTTCGTATACTGAAATATTACCAGTCATTGCTAAAT             |
|                         |                          | fwd 2             | #2205  | AGCGGCTCTTCGATATTCACCAGGTGGACCAGATTCTAG                 |
|                         |                          | outer rev         | #2206  | AGCGGCTCTTCTCCCACCAAGATATTTTGAAACGTAAAC                 |
| <i>ctu1</i>             | Gene deletion            | left arm fw       | #2334  | AGCGCGTCTCCAATGACTAGTGACAGGGGGGCGTCATTAACAA             |
|                         |                          | left arm rev      | #2335  | AGCGCGTCTCCGTTGTTTGTGCTGATTTTCCATTTTATTTATTTGTTTG       |
|                         |                          | right arm fw      | #2336  | AGCGCGTCTCCCTTCAGTACTTCAGCAGCAACAACAACAAC               |
|                         |                          | right arm rev     | #2337  | AGCGCGTCTCTCCCACTAGTTCAGATTTACTTGTTTTGGATCAACTTTAATAATC |
|                         | Wt detection             | outer fw          | #2338  | GATGAATTTTAAACAAATATTCAAAGGGGGGAG                       |
|                         |                          | inner fw          | #2339  | TATCCTTACTTTTCTTCCAACCTAAGTAA                           |
|                         |                          | outer fw          | #2340  | AGAGGAAAAGATAATAATAATAATAGTAATAATAATGAT                 |
|                         |                          | outer rev         | #2341  | CTTGATACATTACAACTTCACATAATTTTGATTTTC                    |
| <i>trm9</i>             | Gene deletion            | left arm fw       | #2537  | AGCGCGTCTCCAATGACTAGTCATGACCATTGATTATCATAGATCTTTTGA     |
|                         |                          | left arm rev      | #2538  | AGCGCGTCTCCGTTGTCATCACTAATCTCTGGTACTCCT                 |
|                         |                          | right arm fw      | #2538  | AGCGCGTCTCCCTTCAGAATGTGAAATGGTTGAAATAATTTAGATCA         |
|                         |                          | right arm rev     | #2539  | AGCGCGTCTCTCCCACTAGTTCAGTGAAGTTTGGATTGGTACTTC           |
|                         | Wt detection             | outer fw          | #2540  | CCAGAAGGTACAGTAGATACAAC                                 |
|                         |                          | inner fw          | #2541  | CAAGATGATACTAATGGTGATGGC                                |
|                         |                          | outer fw          | #2542  | GAAGAAGATAAAATTATTGAAAAATCAGGTTTC                       |
|                         |                          | outer rev         | #2543  | GGTATTTACCATTACCACAACCAAC                               |
| <i>tQ<sup>UG</sup></i>  | Gene deletion            | left arm fw       | #2583  | AGCGCGTCTCCAATGACTAGTCTCCTTCATATGCTAATTCTCCACTAC        |
|                         |                          | left arm rev      | #2584  | AGCGCGTCTCCGTTGCCTCACATTATCATTGGACAGATTCCA              |
|                         |                          | right arm fw      | #2585  | AGCGCGTCTCCCTTCCAACGAAAAATGCGCAATTTGGATACGT             |
|                         |                          | right arm rev     | #2586  | AGCGCGTCTCTCCCACTAGTCTGAAAGTTTTCAATAACAATTTCACTAATTTCC  |
|                         | Over expression          | gen fw hindIII    | #2526  | AGAAAGCTTGGAATCTGTCCAAATGATAATGTGAG                     |
|                         |                          | gen rev hindIII   | #2527  | TCTAAGCTTGATTAACTTCTTATTTAATTTGTGGAGATTAG               |
|                         | Northern Blot            | 5' probe          |        | GTCCTACTGAGATTCGAATC                                    |
|                         |                          |                   |        |                                                         |
| <i>tQ<sup>UG</sup></i>  | Northern Blot            | gen fw xhoI       | #2530  | AGACTCGAGCAAATCTAGGTATTGGGCAAAAATAG                     |
|                         |                          | gen rev xhoI      | #2529  | TCTCTCGAGGTTTTGTTTTATTTTGTGTTTTATTTTGGTTTTGTG           |
|                         |                          | 5' probe          |        | GGTGCTAACCAATTACACTATAAAA                               |
| <i>tk<sup>UUU</sup></i> | Northern Blot            | 5' probe          |        | TGCGCTCTACCGACTGAGCT                                    |
| <i>tE<sup>UUC</sup></i> | Northern Blot            | 5' probe          |        | TTACCGACTACACCAATGAGGA                                  |
| <i>tG<sup>GCC</sup></i> | Northern Blot            | 5' probe          |        | GGCAGGGATGCATCATACCA                                    |

<sup>a</sup> Wt: wildtype

<sup>b</sup> fw: forward, rev: reverse, gen: genomic

**Table S2:** Elongator proteins in *D. discoideum*.

| Name <sup>a</sup> | Gene ID <sup>b</sup> | ORF size | Protein size | Sequence Identity <sup>c</sup> |
|-------------------|----------------------|----------|--------------|--------------------------------|
| Elp1              | DDB_G0284075         | 4286 bp  | 160 kDa      | 28%                            |
| Elp2              | DDB_G0275651         | 2706 bp  | 100 kDa      | 27%                            |
| Elp3              | DDB_G0290103         | 1680 bp  | 63 kDa       | 70%                            |
| Elp4              | DDB_G0278783         | 1320 bp  | 48 kDa       | 20%                            |
| Elp5              | DDB_G0276569         | 1270 bp  | 45 kDa       | <20%                           |
| Elp6              | DDB_G0268624         | 1130 bp  | 38 kDa       | <20%                           |

<sup>a</sup>Elp1-4 are annotated in dictybase.org, while Elp5 and Elp6 were identified by protein blast searches on the NCBI database (<https://blast.ncbi.nlm.nih.gov/Blast.cgi?PAGE=Proteins>)

<sup>b</sup>Gene Identity at dictybase.org

<sup>c</sup>Protein sequence identity to the *S. cerevisiae* homologue

**Table S3:** Mass spectrometric parameters for detection of nucleosides.

| Name                              | RT <sup>a</sup> [min] | m/z Precursor | m/z Product | CE <sup>b</sup> [eV] |
|-----------------------------------|-----------------------|---------------|-------------|----------------------|
| cm <sup>5</sup> U*                | 1.6                   | 303           | 171         | 10                   |
| C                                 | 1.8                   | 244           | 112         | 40                   |
| ncm <sup>5</sup> U                | 2.0                   | 302           | 170         | 10                   |
| Psi                               | 1.6                   | 245           | 191         | 10                   |
| U                                 | 2.5                   | 245           | 113         | 40                   |
| G                                 | 4.1                   | 284           | 152         | 40                   |
| ncm <sup>5</sup> s <sup>2</sup> U | 4.2                   | 318           | 186         | 10                   |
| Q                                 | 4.4                   | 410           | 295         | 10                   |
| s <sup>2</sup> U                  | 4.5                   | 261           | 129         | 10                   |
| mcm <sup>5</sup> U                | 5.0                   | 317           | 185         | 10                   |
| A                                 | 5.3                   | 268           | 136         | 40                   |
| <sup>15</sup> N dA                | 5.6                   | 257           | 141         | 10                   |
| mcm <sup>5</sup> s <sup>2</sup> U | 6.4                   | 333           | 201         | 10                   |

<sup>a</sup>RT: retention time

<sup>b</sup>CE: collision energy

\*Attention: Due to the similar RT and m/z of cm<sup>5</sup>U and ncm<sup>5</sup>U, special care is needed during data analysis to avoid integration of ncm<sup>5</sup>U instead of cm<sup>5</sup>U.

**Table S4:** Minimal detectable amount of modified nucleoside per tRNA [in %] in a 100 ng tRNA injection.

| Modification                      | LOQ modification per tRNA [%] | LOQ <sup>a</sup> in fmol | LOD <sup>b</sup> in fmol |
|-----------------------------------|-------------------------------|--------------------------|--------------------------|
| cm <sup>5</sup> s <sup>2</sup> U* | 1,318                         | 100                      | 10                       |
| cm <sup>5</sup> U                 | 0,05                          | 2                        | 1                        |
| mcm <sup>5</sup> s <sup>2</sup> U | 0,26                          | 10                       | 1                        |
| mcm <sup>5</sup> U                | 0,26                          | 10                       | 1                        |
| ncm <sup>5</sup> s <sup>2</sup> U | 0,26                          | 10                       | 10                       |
| s <sup>2</sup> U                  | 0,05                          | 2                        | 10                       |

\*not detectable in any of the analyzed tRNA samples.

<sup>a</sup>lower limit of quantification (LOQ) of modified nucleosides from calibration measurements.

<sup>b</sup>Limit of detection (LOD) of modified nucleosides from calibration measurements.

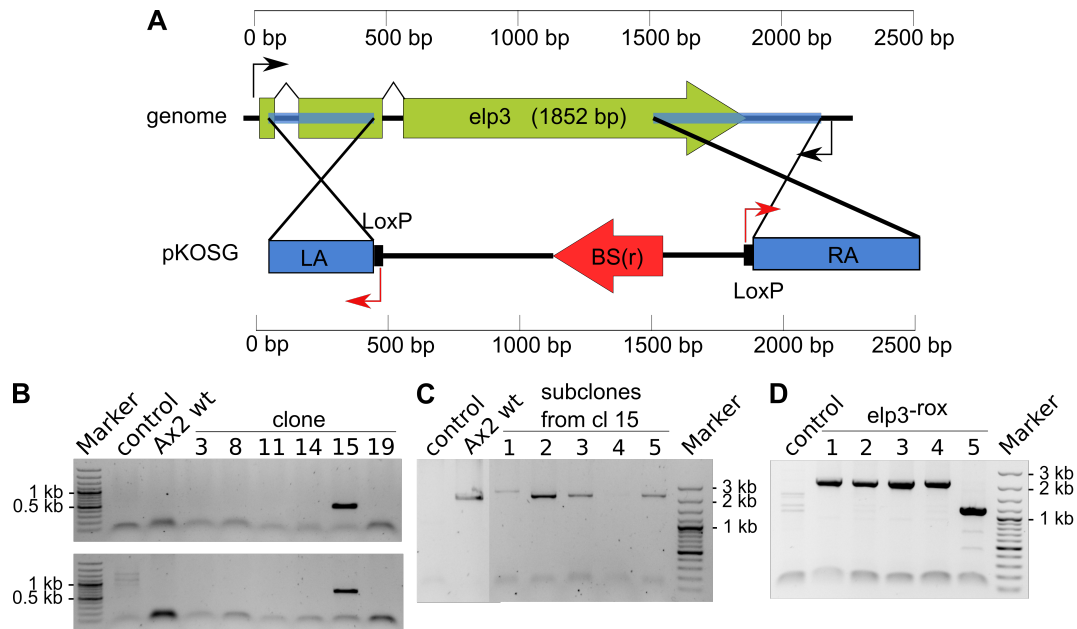

**Figure S1. Deletion of the *D. discoideum elp3* gene.**

(A) Top: Sketch of the *elp3* gene (green arrow) with two introns in its genomic context. Left (LA) and right arm (RA) for homologous recombination (crosses) are indicated in blue and have sizes of 400 bp and 637 bp, respectively. Bottom: pKOSG construct for homologous recombination featuring a blasticidin S resistance (BS(r)) cassette flanked by LA and RA. The thin black and red arrows represent the binding sites for outer wild type primers and LoxP primers, respectively. Except for primer binding sites, figure is drawn to scale. (B) PCR screening for LA (top) and RA (bottom) integration using primers specific for the genomic locus and the LoxP-sites in the construct. A signal is only expected when integration occurred at the designated genomic locus. (C) PCR Screening over the genomic area using outer wild type primers (black arrows). Upon integration of the pKOSG construct, the amplicon is expected to be 374 bp larger than that of the Ax2 wild type. The picture has been pasted together omitting irrelevant lanes. (D) PCR screening for removal of the BS(r) cassette upon transient expression of Cre recombinase. Successful recombination is expected to result in an amplicon with a size reduced by 1500 bp (clone 5 = *elp3*<sup>-rox</sup>). (B-D) Control is a PCR reaction without added DNA template. Marker: GeneRuler 100bp DNA Ladder Plus. PCR products were separated electrophoretically on 1 % (B) or 0.8 % (C, D) agarose gels and visualized by Ethidium bromide staining.

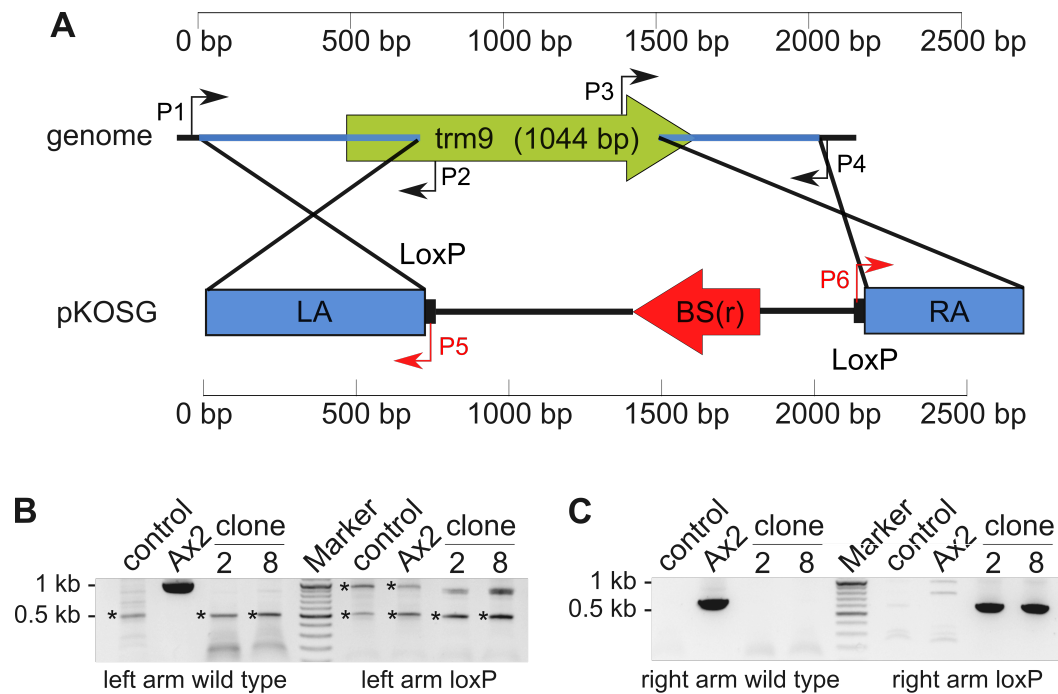

**Figure S2. Deletion of the *D. discoideum* *trm9* gene.**

(A). Top: Sketch of the *trm9* gene (green arrow) in its genomic context. Left (LA) and right arm (RA) for homologous recombination (crosses) are indicated in blue and have sizes of 720 bp and 523 bp, respectively. Bottom: pKOSG construct for homologous recombination featuring a blasticidin S resistance (BS(r)) cassette surrounded by LA and RA. P1-P4 (thin black arrows) represent the binding sites for wild type primers and P5 and P6 (red arrows) that for the LoxP primers. Except for primer binding sites, figure is drawn to scale. (B) PCR screening for LA wild type signals using P1 and P2 (left) and for LA pKOSG integration using P1 and P5 (right). (C) PCR screening for RA wild type signals using P3 and P4 (left) and for RA pKOSG integration using P6 and P4 (right). (B-C) Control is a PCR reaction without added DNA template and Ax2 is the wild type. Bands marked with \* indicate unspecific PCR products that are also seen in the control without added DNA template. Marker = GeneRuler 100bp DNA Ladder Plus. PCR products were separated electrophoretically on 1 % agarose gels and visualized by Ethidium bromide staining.

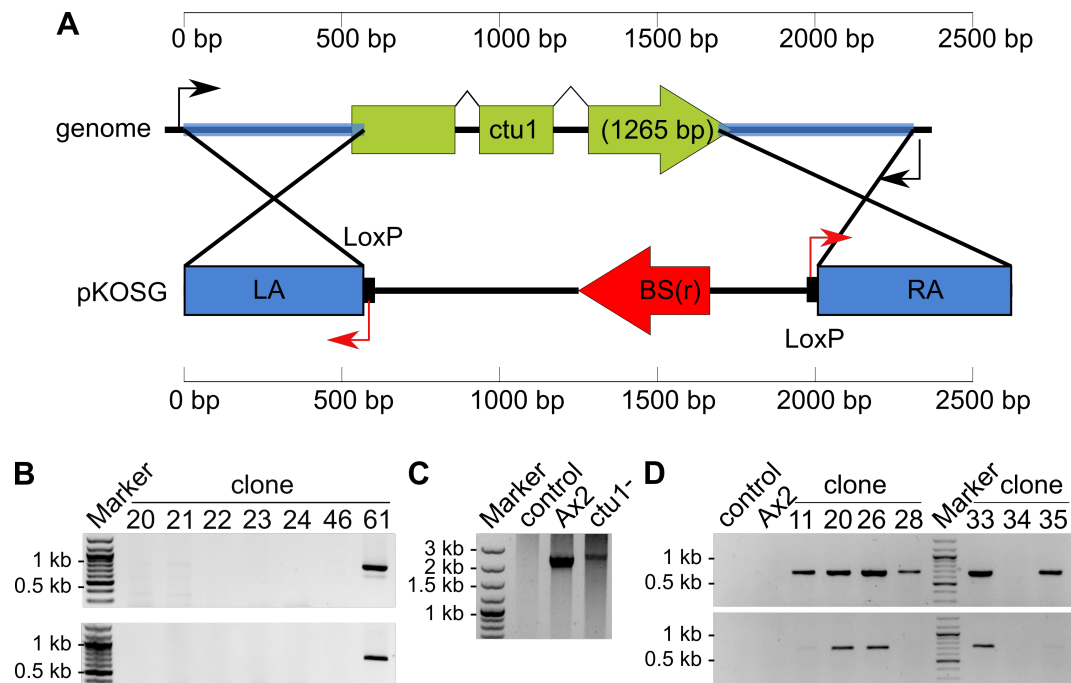

**Figure S3. Deletion of the *D. discoideum* *ctu1* gene in the Ax2 and *elp3*<sup>-</sup> strains.**

(A) Top: Sketch of the *ctu1* gene (green arrow) in its genomic context. Left (LA) and right arm (RA) for homologous recombination (crosses) are indicated in blue and have sizes of 573 bp and 620 bp, respectively. Bottom: pKOSG construct for homologous recombination featuring a blasticidin S resistance (BS(r)) cassette surrounded by LA and RA. The thin black and red arrows represent the binding sites for outer wild type primers and LoxP primers, respectively. Except for primer binding sites, figure is drawn to scale. (B) PCR screening for LA (top) and RA (bottom) integration using primers specific for the genomic locus and the LoxP-sites in the construct. A signal is only expected when integration occurred at the designated genomic locus. (C) PCR Screening over the genomic area using outer wild type primers (black arrows). Upon integration of the pKOSG construct, the amplicon is expected to be 300 bp larger than that of the Ax2 wild type. (D) PCR screening for pKOSG-*ctu1* integration in the *elp3*<sup>tox</sup> background for LA (top) and RA (bottom) integration using primers specific for the genomic locus and the LoxP-sites in the construct. A signal is only expected when integration occurred at the designated genomic locus. (B, D) Control is a PCR reaction without added DNA template. (B-D) Marker = GeneRuler 100bp DNA Ladder Plus. PCR products were separated electrophoretically on 1 % agarose gels and visualized by Ethidium bromide staining.

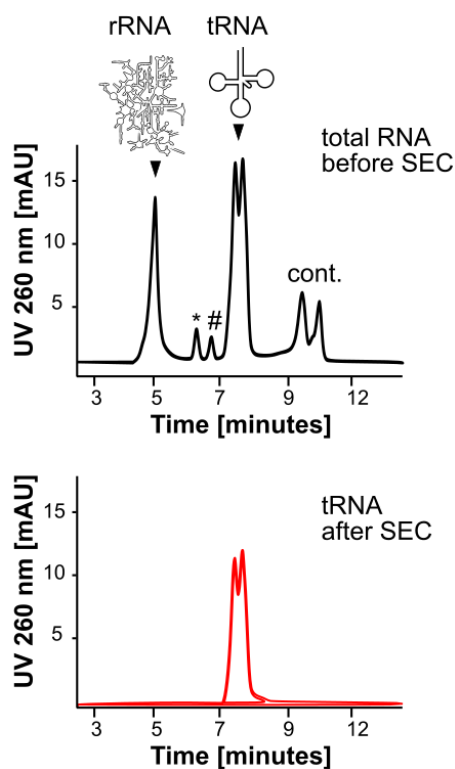

**Figure S4. Size exclusion chromatogram (SEC) of total RNA before SEC purification and tRNA fraction after SEC purification.** Top: Profile of total RNA isolated with TRI on a 300 Å size exclusion column. rRNA is separated from 5.8S rRNA (\*), 5S rRNA (#) and tRNA. Later small contaminants like phenol elute from the column (cont.) between minute 10 and 12. Bottom: Profile of purified tRNA fraction after SEC purification as quality control.

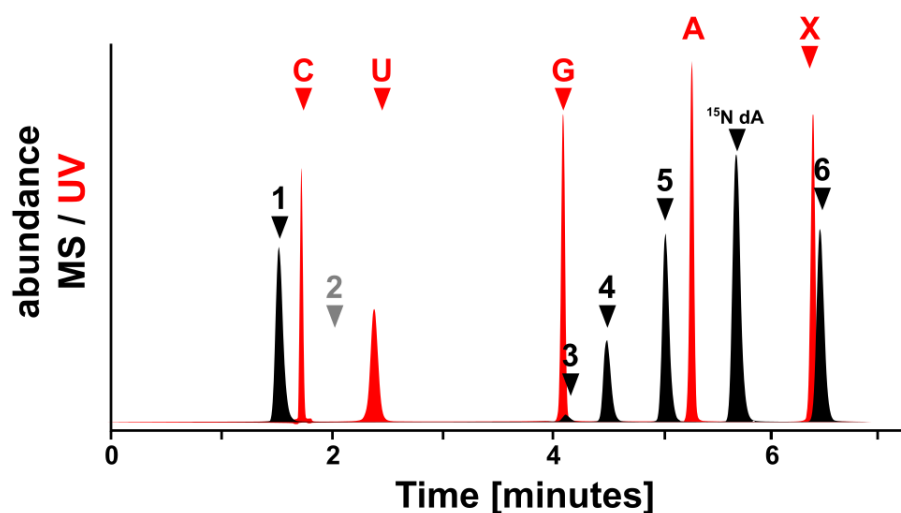

**Figure S5. LC-UV-MS/MS chromatogram of synthetic standards for analysis of modified nucleosides.** Red: UV signal at 260 nm for detection of canonical nucleosides cytidine (C), uridine (U), guanosine (G) and adenosine (A). The external standard theophylline is indicated as X. Black: MS/MS signal of mass transitions of modified uridine derivatives and internal standard <sup>15</sup>N-dA (Table S3). 1: cm<sup>5</sup>U, 2: ncm<sup>5</sup>U (not available as synthetic standard, position indicated by grey arrow only), 3: ncm<sup>5</sup>s<sup>2</sup>U, 4: s<sup>2</sup>U, 5: mcm<sup>5</sup>U and 6: mcm<sup>5</sup>s<sup>2</sup>U.

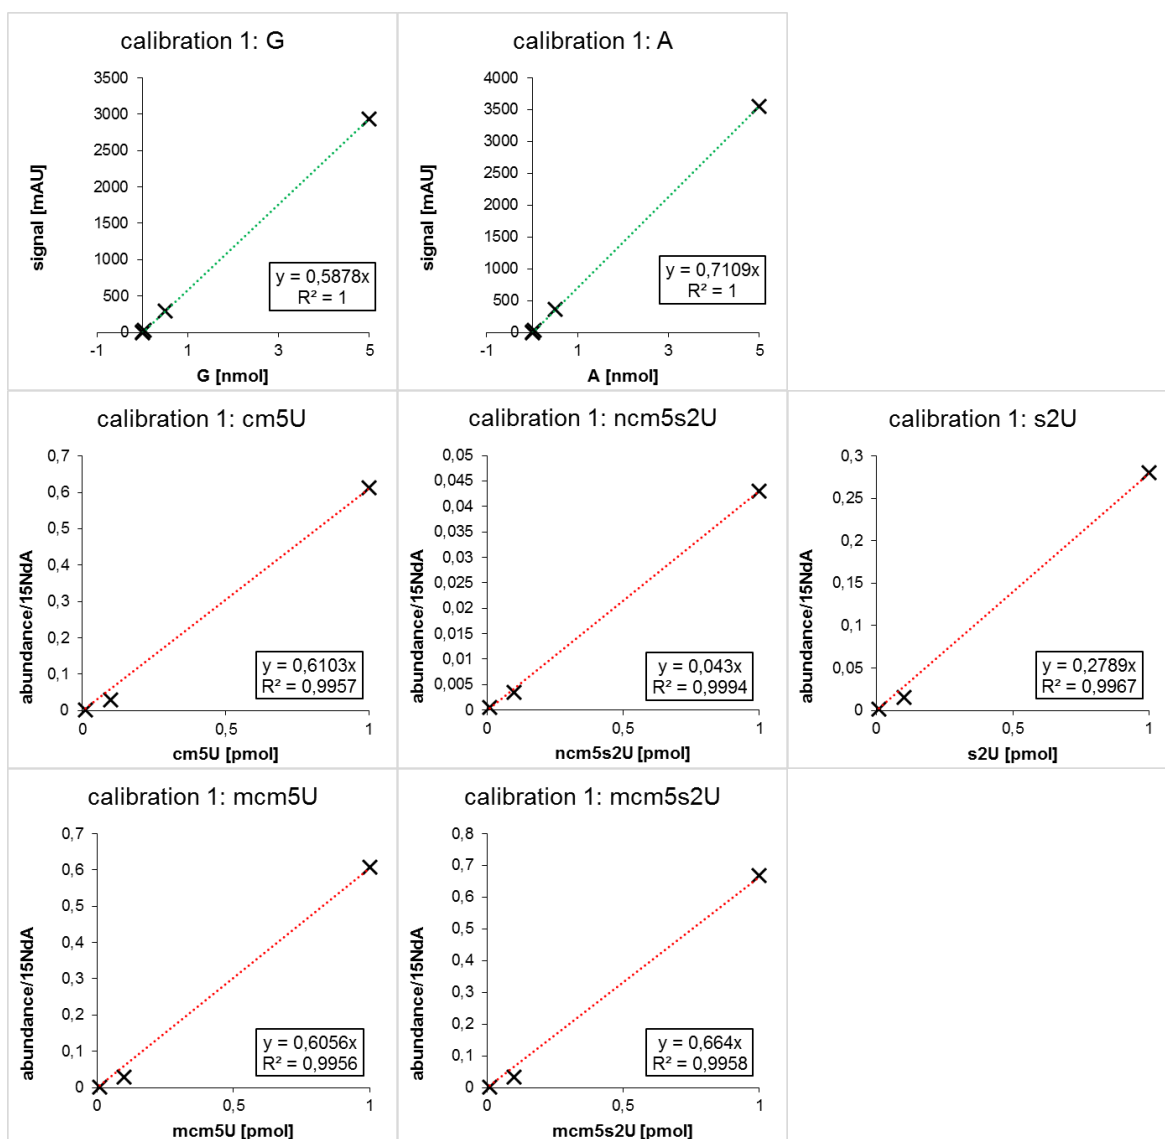

**Figure S6. Calibration curves for quantification of nucleosides by photometric and mass spectrometric detection.** Top: Exemplary calibration curve of guanosine (G) and adenosine (A) in the range of 0.5 to 5000 pmol (0.0005 to 5 nmol) at  $\lambda$  260 nm. Middle: Exemplary calibration curve of  $\text{cm}^5\text{U}$ ,  $\text{ncm}^5\text{s}^2\text{U}$  and  $\text{s}^2\text{U}$  in the range of 0.01 to 1 pmol at their respective mass transition (Supplemental Table S3). Bottom: Exemplary calibration curve of  $\text{mcm}^5\text{U}$  and  $\text{mcm}^5\text{s}^2\text{U}$  in the range of 0.01 to 1 pmol at their respective mass transition (Supplemental Table S3).

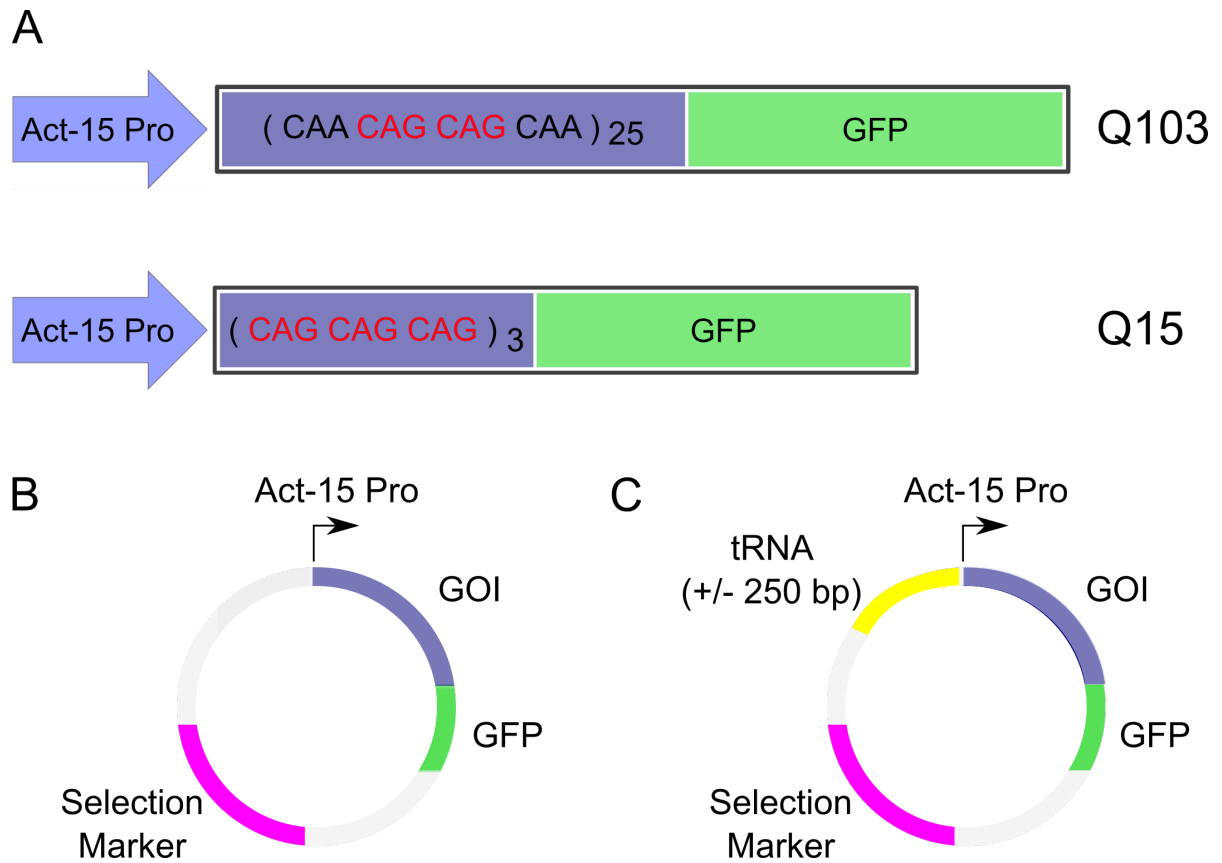

**Figure S7. Sketch of poly glutamine leader constructs fused to GFP.**

(A) Q103 is the extended human Huntington exon 1 and features a stretch of 103 glutamine codons, of which 50 % are CAA and CAG, respectively, upstream of GFP. Q15 is a synthetic leader construct consisting of 15 CAG codons. Both constructs are expressed from an Actin-15 promoter (Act-15 Pro). The leader constructs (GOI, gene of interest) were expressed from extrachromosomal pDM323 or pDM353 plasmids, either alone (B) or together with tRNA genes (C). For this, the sequence of the tRNA genes (+/- 250 bp genomic surrounding) were cloned in the same plasmid as the leader sequence (C). Please note that constructs are not drawn to scale.
